# Supplementary material for: Insights into the Bioinformatics and Transcriptional Analysis of the Elongator Complexes (ELPs) Gene Family of Wheat: TaELPs Contribute to Wheat Abiotic Stress Tolerance and Leaf Senescence
Source: Plants (Basel). 2023 Feb 20;12(4):952. doi: 10.3390/plants12040952 (PMC9961319; doi:10.3390/plants12040952)
Supplement: Supplementary file 1 [file plants-12-00952-s001.zip › Supplementary tables 02.17.xlsx]

## Sheet: Table S1
Table S1. ELP protein sequences identified from wheat genome
Protein name	Protein ID			Protein sequences
TaELP1-A	TraesCS1A02G104700.1			MPPAAGELAGAGGGVEAERVFIGAGCNRVVNNVSWGACGLVAFGAQNAVALFSPSRGEIVTTLPGHKAAVNCTLWLPTKKDVLQVRSRETHYLLSGSSDGAIMAWKIGSGIGKWSHVLQLPAMHKKGVTCLAGRMVSDRVTIFASTSSDGMVVIWEMVVEPTAGGSCKVSCLHSLSVGLKPMVSLSLAVLPEQEGCLILAMGGLDHKVHIYCGDQSGKFIKACELKGHSDWIRSLDFSLPVMTSSEKHGLFLVSSSQDKTIRIWKMTSDVQQRKDNIGMASYIEGPLFVAGNTSYQVSLESLLVGHEDWVYSVEWQPPRLLLGGKAHQPMSILSASMDKMMMIWRPEKNTGLWINSVTVGELSHSALGFYGGHWEPDGKSILAHGYGGFFHMWRDVGLD…
TaELP1-B	TraesCS1B02G116100.1			MPPAAGELAGARGGVEAERVFIGAGCNRVVNNVSWGACGLVAFGAQNAVALFSPSRGEIVTTLPGHKAAVNCTLWLPTKKDVLQVQSRETHYLLSGSSDGAIMAWKIGSGIGKWSHVLQLPAMHKKGVTCLAGRMVSDRVSIFASTSSDGIVVIWEMVVEPTADGSCKVSCLHSLSVGLKPMVSLSLVVLPEQEGLILAMGGLDHKVHIYCGDQSGKFIKACELKGHSDWIRSLDFSLPVMTSSEKHSLFLVSSSQDKTIRIWKMTSDVQQRKDNIGMASYIEGPLFVAGNTSYQVSLESLLVGHEDWVYSVEWQPPRLLLGGEAHQPMSILSASMDKMMMIWRPEKNTGLWINSVTVGELSHSALGFYGGHWEPDGKSILAHGYGGFFHMWRDVGLDS…
TaELP1-D	TraesCS1D02G096900.1			MPPAAGELAGARGGAEAERVFIGAGCNRVVNNVSWGACGLVAFGAQNAVALFSPLRGEIVTTLPGHKAAVNCTLWLPTKKDVLQVQSRETHYLLSGSSDGAIMAWKIGSGIGKWSHVLQLPAMHKKGVTCLAGRMVSDRVSIFASTSSDGMVVIWEMVVEPTAGGKMIYWHFGCCKVSCLHSLSVGLKPMVSLSLAVLPEQEGCLILAMGGLDHKVHIYCGDQSGKFIKACELKGHSDWIRSLDFSLPVMTSSEKHSLFLVSSSQDKTIRIWKMTSDVQQRKDNIGMASYIEGPLFVAGNTSYQLSLESLLVGHEDWVYSVEWQPPTLLLGGEAHQPMSILSASMDKMMMIWRPEKNTGLWINSVTVGELSHSALGFYGGHWEPDGKSILAHGYGGFFH…
TaELP2-A	TraesCS2A02G203700.1			MKNLKLVTRVVQELQLHLDGETLVVSAIDAERHRAFFVSSANFLYSVNLLASTQQPLQWSKTTLDSDVEEVLLEPGDFIVAMDYLMEKESLLLGSADGCLLLYNVEERTTEVVGRLEGGVKTIASSPDGALLSVTTGLGQLLVMTHDWEVLFETSIDPQSASACEINSSDGQIQSCVSWRGDGKHFATLGGFDDSPKKLTIWERESGKVHSSSDTNNFMGQSLDWMPSGAKVVTAHDRKTEGKCPLIVFYEKNGLERSHFSIEEPAEVVIQALKWNCNSELLAALVSCGQYDVIKIWSCSNNHWYLKQELRYTKKEGVKFSWDPTKPLHLICWTLGGEVIAHRFAWTTAVSETSVALVIDGLRILITPLHLGLMPPPMSLFYLAFPCSVNEVCFVSKNS…
TaELP2-B	TraesCS2B02G231000.1			MKNLKLVTRIVQELQLHLDGETLVVSAIDAERHRAFFVSSANFLYSVNLLASTQQPLQWSKTTLDSDVEEVLLEPGDFIVAMDYLMEKESLLLGSADGCLLLYNVEERTTEVVGRLEGGVKTIASSPDGALLSVTTGLGQLLVMTHDWEVLFETSIDPQSASACEINSSDGQIQSCVSWRGDGKHFATLGGFDGNPKRLTIWERESGKVHSSSDTKNFMGQSLDWMPSGAKVVTAHDRRTEGKCPLIVFYEKNGLERSHFSIEEPTEVVIQALKWNCNSELLAALVSCGQYDVIKIWSCSNNHWYLKQELRYTKKEGVKFSWDPTKPLHLICWTLGGEVIAHSFAWTTAVSETSVALVIDGPRILITPLHLGLMPPPMSLFYLAFPCTVNEVCFVSKNS…
TaELP2-D	TraesCS2D02G212000.1			MKNLKLVTRIVQELQLHLDGETLVVSAIDAERHRAFFVSSANFLYSVNLLASTQQPLQWSKTTLDSDVEEVLLEPGDFIVAMDYLMEKESLLLGSADGCLLLYNVEERTTEVVGRLEGGVKTIASSPDGALLSVTTGLGQLLVMTHDWEVLFETSIDPQSASACEINTSDGQIQSCVSWRGDGKHFATLGGFDGSPKKLTIWERESGKVHSSSDTRNFMGQSLDWMPSGAKVVTAHDRKTEGKCPLIVFYEKNGLERSHFSIEEPAEVVIQALKWNCNSELLAALVSCGQYDVIKIWSCSNNHWYLKQELRYTKNEGVKFSWDPTKPLHLICWTLGGEVIAHRFAWTTAVSETSVALVIDGPRILITPLHLGLMPPPMSLFFLAFPCAVNEVCFVSKNS…
TaELP3-A	TraesCS2A02G320900.1			MAAAVAAAAADQPRRRKPTPGRGGVVLPAGLSEEEARVRAIAEIVSEMGELSRRGEDVDLNALKSAACRRYGLARAPKLVEMIAAVPEADRAALLPRLRAKPVRTASGIAVVAVMSKPHRCPHIATTGNICVYCPGGPDSDFEYSTQSYTGYEPTSMRAIRARYNPYVQARSRIDQLKRLGHSADKVEFILMGGTFMSLPADYRDYFIRNLHDALSGHTSANVEEAVCYSEHSAVKCIGMTIETRPDYCLGPHLRQMLSYGCTRLEIGVQSTYEDVARDTNRGHTVAAVADCFSLAKDAGFKVVAHMMPDLPNVGVERDMESFREFFENPAFRADGLKIYPTLVIRGTGLYELWKTGRYRNYPPELLVDIVARILSMVPPWTRVYRVQRDIPMPLVTSG…
TaELP3-B	TraesCS2B02G361800.1			MAAVVAAAAADQPRRRKPTPGRGGVVLPAGLSEEEARVRAIAEIVSEMGELSRRGEDVDLNALKSAACRRYGLARAPKLVEMIAAVPEADRAALLPRLRAKPVRTASGIAVVAVMSKPHRCPHIATTGNICVYCPGGPDSDFEYSTQSYTGYEPTSMRAIRARYNPYVQARSRIDQLKRLGHSADKVEFILMGGTFMSLPADYRDYFIRNLHDALSGHTSANVEEAVCYSEHSAVKCIGMTIETRPDYCLGPHLRQMLSYGCTRLEIGVQSTYEDVARDTNRGHTVAAVADCFSLAKDAGFKVVAHMMPDLPNVGVERDMESFREFFENPAFRADGLKIYPTLVIRGTGLYELWKTGRYRNYPPELLVDIVARILSMVPPWTRVYRVQRDIPMPLVTSG…
TaELP3-D	TraesCS2D02G341600.1			MAAAVAAAAADQPRRRKPTPGRGGVVLPAGLSEEEARVRAIAEIVSEMGELSRRGEDVDLNALKSAACRRYGLARAPKLVEMIAAVPEADRAALLPRLRAKPVRTASGIAVVAVMSKPHRCPHIATTGNICVYCPGGPDSDFEYSTQSYTGYEPTSMRAIRARYNPYVQARSRIDQLKRLGHSADKVEFILMGGTFMSLPADYRDYFIRNLHDALSGHTSANVEEAVCYSEHSAVKCIGMTIETRPDYCLGPHLRQMLSYGCTRLEIGVQSTYEDVARDTNRGHTVAAVADCFSLAKDAGFKVVAHMMPDLPNVGVERDMESFREFFENPAFRADGLKIYPTLVIRGTGLYELWKTGRYRNYPPELLVDIVARILSMVPPWTRVYRVQRDIPMPLVTSG…
TaELP4-A	TraesCS4A02G045700.1			MADAAVRCLRDGRLDGEHAPALAVEGSLQCCPLAARAMLHVAAAVASNAAAGKAQARGLVVVAFDRSPEVYLDIMLRHGLDSNALSRCVRILDCYSDPLGWKQNIRSQQQQENSGTLCSTNKDTITTFRSVKDVDKLSCSIIDLGRGFEGEGKTYFSVAVDSISSMLRHASVQSISGLLSNLRSHDQISSIFWLMHSDLHETKFSRAFECLSTMVACVEPEVVDSVYGEERRGDMSFLEHNYSKAKFHVRLKRRNGRVKHLYEELCVEGYDVKFISATSVSMEVNQSLLPKVQFNLELSEKERSDRANVVLPFEHQGKGEPIRIYDGRRSLPEAHQDPNLTTAALLDETEALKSANPKGEIHYLRDSDDERPDSDEDPDDDLDI
TaELP4-B	TraesCS4B02G259300.1			MADAAVRCLRDGRLDGEHAPALAVEGSLQCCPLAARAMLHVAAAVASNAAAGKAQARGLVVVAFDRSPEVYLDVMLRHGLDSNALSRCVRILDCYSDPLGWKQNIRRQQQQEDSGTPCSTNKDTITTFRSVKDVDKLSCSIIDLGRGFEGEGKTYFSVAVDSISSMLRHASVQSISGLLSNLRSHDQISSIFWLMHSDLHETKFSRAFECLSTMVACVEPEVVDSVYGEERRGDMSFLEHNYSKAKFHVRLKRRNGRVKHLYEELCVEGCDVKFISATSVSMEVNQSLLPKVQFNLELSEKERSDRANVVLPFEHQGKGEPIRIYDGRRSLPEARQDPNLTTSALLDETEALKSANAKGEIHYLRDSDDERPDSDEDPDDDLDI
TaELP4-D	TraesCS4D02G259200.1			MADAAVRCLRDGRLDGEHAPALAVEGSLQCCPLAARAMLHVAAAVASNAAAGKAQARGLVVVAFDRSPEVYLDIMLRHGLDSNALSRCVRILDCYSDPLGWKQNIRSEQHQEDSGTPCSTNKDTITIFRSVKDVDKLSCSIIDLGRGFEGEGKTYFSVAVDSISSMLRHASVQSISGLLSNLRSHDQISSIFWLMHSDLHETKFSRAFECLSTMVACVEPEVVDSVYGEERRGDMSFLEHNYSKAKFHVRLKRRNGRVKHLYEELCVEGYDVKFISATSVSIEVNQSLLPKVQFNLELSEKERSDRANVVLPFEHQGKGEPIRIYDGRRSLPEAHQDPNLTTAALLDETEALKSANPKGEIHYLRDSDDERPDSDEDPDDDLDI
TaELP5-A	TraesCS4A02G105200.1			MGEYGGGDLLGEAMCAGARVVVVEDCVEAPAAFVLHLLLKRALAAGGGGGAALLALAHPFSHYDRVLRKMGCNLSMHRKSERLHFFDLQAFPGGTRGGAIADSLAQLYSAVQRVVETYRAGENAGRLTVMIDDVSLLEVAANGSADDVLDFLHYCVTLTSEMNCLLVVLIHEDIYSSEDGVGLLAHLRYIADLVIKAAPLSTGLAADVHGQLSVVNKGMLIEQRPAKGQKVWNFHFKVKENGADFFYPGSRH
TaELP5-B	TraesCS4B02G198800.1			MEEYGAGDLLSEAMCAGGRVVVVEDCVEAPAAFVLHLLLKRALAAAGGAALLALAHPFSHYDRVLRKMGCNLSMHRKSERLHFFDLQAFPGGTRGGAIADSLAQLYSGVQRVVETYRSGENAGRFTVMIDDVSLLEVAASGSADDVLDFLHYCVTLTSEMNCSLVVLIHEDIYSSEDGVGLLAHLRYIADLVIKAAPLSTGLAADVHGQLSVINKGMLIEQRPAKGRKVWNFHFKVKENGADFFYPGSRH
TaELP5-D	TraesCS4D02G199700.1			MEEYGAGDLLSEAMCAGARVVVVEDCVEAPAAFVLHLLLKRALAAGGGGGGGAALLALAQPFSHYDRVLRKMGCNLSMHRKSERLHFFDLQGFPGGTRGGAIADSLAQLYSAVQRVVETCRAGENAGRFTVMIDDVSLLEVAANGSADDVLDFLHYCVTLTSEMNCSLVVLIHEDIYSSEDGVGLLAHLRYIADLVIKAAPLSTGLATDVHGQLSVVNKGMLIEQRPAKGRKVWSFHFKVKENGADFFYPGSRH
TaELP6-A	TraesCS7A02G522900.2			MAAAAAAGTGGQTLGRSSFSRAASSKTASSSSSPTASGVKLGPNGAAFVSSGIPDLDRILGGGFLLGSVVMVMEDSDAPHHLLLLRAFMSQGVVHKQPLLFAAPMKEPRSFLGALPAPVASSKEDARQRAMAGGAAGDGRDEGLRIAWQYRKYFGDERNSSAEHRDNKQEFSHDFDLRKPLERHLLNAQHIECLSTQDLDTLHDLQDRCSAFLSKHQRKEGGNLSAGRIAIQSLCAPECGYFGKDWDMVLFLRSLKAMVRSSNAVAIITFPHTVLSDSFCKRWQHLADTLLSIKAIPDEDKDLAKLLTGYQDMVGFLHVHKVAQTNSQVPVILEASTFSLKLRKRRSLVLERLNQAPVDGSSGPSSGGSGSCSSSTQGSQLDF
TaELP6-B	TraesCS7B02G439900.1			MAAAAAAGTGAQTLGRSSFSRAASSKTASSSSPVTPSGVKLGPNGAAFVSSGIPDLDRILGGGFLLGSVVMVMEDSDAPHHLLLLRAFMAQGVVHKQPLLFAAPMKEPRSFLGALPAPAASSKEDARQRAMGGGAAGDGRASDEGLRIAWQYRKYFGDERNSSSEHRDSKQEFSHDFDLRKPLERHLLNAQHIECLSTKDVDTLHDLQDRCSAFLSKHQRKEGGNLSAGRIAIQSLCAPQCGYFGKDWDMVSFLRSVKAMVRSSNAVAIVTFPYTVLSDSFCKRWQHLADTLLSIKAIPDEDKDLAKLLTGYQDMVGFLHVHKVAQTNSQVPVILEASTFSLKLRKRRSLVLERLNQAPVDGSSGPSSGGSGSCSSSTQGSQLDF
TaELP6-D	TraesCS7D02G512100.1			MAAAATGTGGQTLGRSSFSRAASSKTASSSSSPTASGVKLGPNGAAFVSSGIPDLDRILGGGFLLGSVVMVMEDSDAPHHLLLLRAFMAQGVVHKQPLLFAAPMKEPRSFLGALPAPVASSKEDARQRAMAGGAAGDGRASDEGLRIAWQYRKYFGDERNSGAEHRDSKQEFSHDFDLRKPLERHLLNAQHIECLSTQDVDTLHDLQDRCSAFLSKHQRKEGGNLSAGRIAIQSLCAPQCGYFGKDWDMVSFLRSLKAMVHSSNAVAIITFPHTVLSDSFCKRWQHLADTLLSIKAIPDEDKDLAKLLTGYQDMVGFLHVHKVAQTNSQVPVILEASTFSLKLRKRRSLVLERLNQAPVDGSSGPSSGGSGSCSSSTQGSQLDF

## Sheet: Table S2 
Table S2. The synteny relationships of wheat ELP genes with different plant species
Ka, Ks, and Ka/Ks values of orthologous ELP gene-pairs
Triticum aestivum-Triticum aestivum
Orthologs pair			Ka	Ks	Ka/Ks	Duplication type	Types of selection	T（Mya)
TaELP6-A/TaELP6-B			0.0199562	0.154939	0.1288	WGD or segmental	Purify selection	8.51314
TaELP6-A/TaELP6-D			0.0120986	0.0919645	0.131557	WGD or segmental	Purify selection	5.05299
TaELP6-B/TaELP6-D			0.0203012	0.127766	0.158893	WGD or segmental	Purify selection	7.02013
TaELP1-A/TaELP1-B			0.0104984	0.0790322	0.132837	WGD or segmental	Purify selection	4.34243
TaELP1-A/TaELP1-D			0.0104851	0.0981137	0.106867	WGD or segmental	Purify selection	5.39086
TaELP1-B/TaELP1-D			0.00943697	0.0829799	0.113726	WGD or segmental	Purify selection	4.55933
TaELP2-A/TaELP2-B			0.00891149	0.0503451	0.177008	WGD or segmental	Purify selection	2.76621
TaELP2-A/TaELP2-D			0.00857458	0.0456669	0.187764	WGD or segmental	Purify selection	2.50917
TaELP2-B/TaELP2-D			0.00858402	0.050256	0.170806	WGD or segmental	Purify selection	2.76132
TaELP3-A/TaELP3-B			0.00157511	0.0798014	0.0197379	WGD or segmental	Purify selection	4.38469
TaELP3-A/TaELP3-D			0.000787143	0.0952692	0.00826231	WGD or segmental	Purify selection	5.23457
TaELP3-B/TaELP3-D			0.000787815	0.0846991	0.00930134	WGD or segmental	Purify selection	4.6538
TaELP4-A/TaELP4-B			0.00918848	0.0409531	0.224366	WGD or segmental	Purify selection	2.25017
TaELP4-A/TaELP4-D			0.00687815	0.0371823	0.184984	WGD or segmental	Purify selection	2.04299
TaELP4-B/TaELP4-D			0.0115055	0.0333182	0.345321	WGD or segmental	Purify selection	1.83067
TaELP5-A/TaELP5-B			0.0233098	0.0926478	0.251596	WGD or segmental	Purify selection	5.09054
TaELP5-A/TaELP5-D			0.0195335	0.0444163	0.439782	WGD or segmental	Purify selection	2.44046
TaELP5-B/TaELP5-D			0.0214652	0.0868439	0.24717	WGD or segmental	Purify selection	4.77164
Triticum aestivum-Oryza sativa
Orthologs pair			Ka	Ks	Ka/Ks	Duplication type	Types of selection	T（Mya)
TaELP2-A	TraesCS2A02G203700.1	Os07t0563700-01	0.0901796	0.487173	0.185108	WGD or segmental	Purify selection	26.7678
TaELP3-A	TraesCS2A02G320900.1	Os04t0484900-01	0.0163592	0.452446	0.0361573	WGD or segmental	Purify selection	24.8597
TaELP2-B	TraesCS2B02G231000.1	Os07t0563700-01	0.0884401	0.50347	0.175661	WGD or segmental	Purify selection	27.6632
TaELP3-B	TraesCS2B02G361800.1	Os04t0484900-01	0.0163734	0.459331	0.0356461	WGD or segmental	Purify selection	25.238
TaELP2-D	TraesCS2D02G212000.1	Os07t0563700-01	0.0893033	0.501642	0.178022	WGD or segmental	Purify selection	27.5627
TaELP4-A	TraesCS4A02G045700.1	Os03t0201700-01	0.103465	0.495416	0.208844	WGD or segmental	Purify selection	27.2207
TaELP5-A	TraesCS4A02G105200.1	Os03t0284000-00	0.102241	0.514706	0.19864	WGD or segmental	Purify selection	28.2805
TaELP5-B	TraesCS4B02G198800.1	Os03t0284000-00	0.106228	0.517098	0.205431	WGD or segmental	Purify selection	28.412
TaELP4-B	TraesCS4B02G259300.1	Os03t0201700-01	0.109463	0.504855	0.216821	WGD or segmental	Purify selection	27.7393
TaELP5-D	TraesCS4D02G199700.1	Os03t0284000-00	0.101089	0.545561	0.185294	WGD or segmental	Purify selection	29.9759
TaELP4-D	TraesCS4D02G259200.1	Os03t0201700-01	0.106776	0.52032	0.205212	WGD or segmental	Purify selection	28.589
TaELP6-B	TraesCS7B02G439900.1	Os06t0639600-01	0.0866647	0.923655	0.093828	WGD or segmental	Purify selection	50.7503
TaELP6-D	TraesCS7D02G512100.1	Os06t0639600-01	0.0800594	0.854037	0.0937423	WGD or segmental	Purify selection	46.9251
Triticum aestivum-Brachypodium distachyon
Orthologs pair			Ka	Ks	Ka/Ks	Duplication type	Types of selection	T（Mya)
TaELP2-A	TraesCS2A02G203700.1	KQK15747	0.0610419	0.31961	0.190989	WGD or segmental	Purify selection	17.561
TaELP3-A	TraesCS2A02G320900.1	KQJ83226	0.00632832	0.263914	0.0239787	WGD or segmental	Purify selection	14.5008
TaELP2-B	TraesCS2B02G231000.1	KQK15747	0.0584445	0.33868	0.172566	WGD or segmental	Purify selection	18.6088
TaELP3-B	TraesCS2B02G361800.1	KQJ83226	0.00633374	0.263123	0.0240714	WGD or segmental	Purify selection	14.4573
TaELP2-D	TraesCS2D02G212000.1	KQK15747	0.0589392	0.340727	0.172981	WGD or segmental	Purify selection	18.7213
TaELP4-A	TraesCS4A02G045700.1	KQK23065	0.0648209	0.28744	0.225511	WGD or segmental	Purify selection	15.7934
TaELP5-A	TraesCS4A02G105200.1	PNT77612	0.0582099	0.43072	0.135145	WGD or segmental	Purify selection	23.666
TaELP5-B	TraesCS4B02G198800.1	PNT77612	0.0639276	0.394251	0.162149	WGD or segmental	Purify selection	21.6622
TaELP4-B	TraesCS4B02G259300.1	KQK23065	0.0629803	0.258245	0.243878	WGD or segmental	Purify selection	14.1893
TaELP5-D	TraesCS4D02G199700.1	PNT77612	0.0600598	0.442777	0.135643	WGD or segmental	Purify selection	24.3284
TaELP4-D	TraesCS4D02G259200.1	KQK23065	0.0604575	0.258617	0.233772	WGD or segmental	Purify selection	14.2097
TaELP6-B	TraesCS7B02G439900.1	KQK16749	0.0567699	0.39582	0.143423	WGD or segmental	Purify selection	21.7484
TaELP6-D	TraesCS7D02G512100.1	KQK16749	0.0500386	0.36391	0.137503	WGD or segmental	Purify selection	19.995
Triticum aestivum-Aegilops tauschii
Orthologs pair			Ka	Ks	Ka/Ks	Duplication type	Types of selection	T（Mya)
TaELP1-A	TraesCS1A02G104700.1	AET1Gv20238300.2	0.0105108	0.0983523	0.106869	WGD or segmental	Purify selection	5.40397
TaELP1-B	TraesCS1B02G116100.1	AET1Gv20238300.2	0.00946012	0.0831801	0.11373	WGD or segmental	Purify selection	4.57034
TaELP1-D	TraesCS1D02G096900.1	AET1Gv20238300.2	0	0	NaN	WGD or segmental	Purify selection	0
TaELP2-A	TraesCS2A02G203700.1	AET2Gv20429300.3	0.00858591	0.0446187	0.192429	WGD or segmental	Purify selection	2.45158
TaELP3-A	TraesCS2A02G320900.1	AET2Gv20771400.1	0.000828901	0.09693	0.00855154	WGD or segmental	Purify selection	5.32582
TaELP2-B	TraesCS2B02G231000.1	AET2Gv20429300.3	0.00859537	0.0492117	0.174661	WGD or segmental	Purify selection	2.70394
TaELP3-B	TraesCS2B02G361800.1	AET2Gv20771400.1	0	0.085585	0	WGD or segmental	Purify selection	4.70247
TaELP2-D	TraesCS2D02G212000.1	AET2Gv20429300.3	0	0.00108186	0	WGD or segmental	Purify selection	0.0594429
TaELP3-D	TraesCS2D02G341600.1	AET2Gv20771400.1	0	0	NaN	WGD or segmental	Purify selection	0
TaELP4-A	TraesCS4A02G045700.1	AET4Gv20643000.3	0.00731267	0.0356503	0.205122	WGD or segmental	Purify selection	1.95881
TaELP5-A	TraesCS4A02G105200.1	AET4Gv20514400.7	0.0205737	0.0478586	0.429886	WGD or segmental	Purify selection	2.6296
TaELP5-B	TraesCS4B02G198800.1	AET4Gv20514400.7	0.025277	0.0879484	0.287407	WGD or segmental	Purify selection	4.83233
TaELP4-B	TraesCS4B02G259300.1	AET4Gv20643000.3	0.0122352	0.027526	0.444495	WGD or segmental	Purify selection	1.51242
TaELP5-D	TraesCS4D02G199700.1	AET4Gv20514400.7	0.00350878	0.00543481	0.645612	WGD or segmental	Purify selection	0.298616
TaELP4-D	TraesCS4D02G259200.1	AET4Gv20643000.3	0	0.00387598	0	WGD or segmental	Purify selection	0.212966
TaELP6-B	TraesCS7B02G439900.1	AET7Gv21275300.2	0.105049	0.317203	0.331173	WGD or segmental	Purify selection	17.4288
TaELP6-D	TraesCS7D02G512100.1	AET7Gv21275300.2	0.102047	0.235468	0.433379	WGD or segmental	Purify selection	12.9378
Triticum aestivum-Triticum dicoccoides
Orthologs pair			Ka	Ks	Ka/Ks	Duplication type	Types of selection	T（Mya)
TaELP1-A	TraesCS1A02G104700.1	TRIDC1AG015670.1	0.00104511	0.00512823	0.203796	WGD or segmental	Purify selection	0.281771
TaELP1-A	TraesCS1A02G104700.1	TRIDC1BG016900.9	0.0105251	0.0773023	0.136155	WGD or segmental	Purify selection	4.24738
TaELP1-B	TraesCS1B02G116100.1	TRIDC1AG015670.1	0.0105251	0.0810992	0.129781	WGD or segmental	Purify selection	4.456
TaELP1-B	TraesCS1B02G116100.1	TRIDC1BG016900.9	0.0010453	0.00343054	0.304703	WGD or segmental	Purify selection	0.188491
TaELP1-D	TraesCS1D02G096900.1	TRIDC1AG015670.1	0.0105117	0.10027	0.104834	WGD or segmental	Purify selection	5.50937
TaELP1-D	TraesCS1D02G096900.1	TRIDC1BG016900.9	0.00997783	0.081148	0.122958	WGD or segmental	Purify selection	4.45868
TaELP2-A	TraesCS2A02G203700.1	TRIDC2BG030800.1	0.00859135	0.0516091	0.16647	WGD or segmental	Purify selection	2.83567
TaELP3-A	TraesCS2A02G320900.1	TRIDC2BG052640.3	0.000789422	0.0776922	0.0101609	WGD or segmental	Purify selection	4.2688
TaELP2-B	TraesCS2B02G231000.1	TRIDC2AG026350.2	0.0095877	0.0504722	0.18996	WGD or segmental	Purify selection	2.7732
TaELP2-B	TraesCS2B02G231000.1	TRIDC2BG030800.1	0.000328767	0.00108342	0.303452	WGD or segmental	Purify selection	0.0595288
TaELP3-B	TraesCS2B02G361800.1	TRIDC2AG049740.1	0.00096782	0.0938479	0.0103127	WGD or segmental	Purify selection	5.15648
TaELP3-B	TraesCS2B02G361800.1	TRIDC2BG052640.3	0.000790098	0.0046154	0.171187	WGD or segmental	Purify selection	0.253593
TaELP2-D	TraesCS2D02G212000.1	TRIDC2AG026350.2	0.00924969	0.0457817	0.202039	WGD or segmental	Purify selection	2.51548
TaELP2-D	TraesCS2D02G212000.1	TRIDC2BG030800.1	0.00826341	0.0515176	0.1604	WGD or segmental	Purify selection	2.83064
TaELP5-D	TraesCS4D02G199700.1	TRIDC4AG014290.2	0.0178793	0.0447894	0.399185	WGD or segmental	Purify selection	2.46096
TaELP5-D	TraesCS4D02G199700.1	TRIDC4BG035790.1	0.0921275	0.21051	0.437639	WGD or segmental	Purify selection	11.5665
TaELP4-D	TraesCS4D02G259200.1	TRIDC4AG006340.1	2.41416	0.974462	2.47742	WGD or segmental	Purify selection	53.5419
TaELP4-D	TraesCS4D02G259200.1	TRIDC4BG044820.1	0.0130268	0.0297912	0.437271	WGD or segmental	Purify selection	1.63688
Triticum aestivum-Glycine max
Orthologs pair			Ka	Ks	Ka/Ks	Duplication type	Types of selection	T（Mya)
TaELP3-A	TraesCS2A02G320900.1	KRH63718	0.0760602	1.67196	0.0454915	WGD or segmental	Purify selection	91.8661
TaELP3-A	TraesCS2A02G320900.1	KRH54237	0.0775629	1.69296	0.0458149	WGD or segmental	Purify selection	93.0199
TaELP3-B	TraesCS2B02G361800.1	KRH63718	0.0790535	1.63041	0.0484867	WGD or segmental	Purify selection	89.5832
TaELP3-B	TraesCS2B02G361800.1	KRH54237	0.0749947	1.61337	0.0464832	WGD or segmental	Purify selection	88.6467
TaELP3-D	TraesCS2D02G341600.1	KRH63718	0.073935	1.60436	0.0460838	WGD or segmental	Purify selection	88.1517
TaELP3-D	TraesCS2D02G341600.1	KRH54237	0.0754338	1.66581	0.0452836	WGD or segmental	Purify selection	91.5279

## Sheet: Table S3
Table S3. Phylogenetic tree member with their gene ID
Plant species	Protein Name	Gene ID
Triticum aestivum	TaELP1-A	TraesCS1A02G104700.1
	TaELP1-B	TraesCS1B02G116100.1
	TaELP1-D	TraesCS1D02G096900.1
	TaELP2-A	TraesCS2A02G203700.1
	TaELP2-B	TraesCS2B02G231000.1
	TaELP2-D	TraesCS2D02G212000.1
	TaELP3-A	TraesCS2A02G320900.1
	TaELP3-B	TraesCS2B02G361800.1
	TaELP3-D	TraesCS2D02G341600.1
	TaELP4-A	TraesCS4A02G045700.1
	TaELP4-B	TraesCS4B02G259300.1
	TaELP4-D	TraesCS4D02G259200.1
	TaELP5-A	TraesCS4A02G105200.1
	TaELP5-B	TraesCS4B02G198800.1
	TaELP5-D	TraesCS4D02G199700.1
	TaELP6-A	TraesCS7A02G522900.2
	TaELP6-B	TraesCS7B02G439900.1
	TaELP6-D	TraesCS7D02G512100.1
Zea mays	ZmELP1	Zm00001eb082380_P001
	ZmELP2	Zm00001eb033820_P002
	ZmELP3	Zm00001eb079280_P001
	ZmELP4	Zm00001eb425150_P001
	ZmELP5	Zm00001eb387250_P002
	ZmELP6	Zm00001eb007750_P002
	ZmELP7	Zm00001eb378810_P001
Solanum lycopersicum	SlELP1	Solyc05g054630.3.1
	SlELP2	Solyc06g008310.3.1
	SlELP3	Solyc03g110905.1.1
	SlELP4	Solyc11g010950.2.1
	SlELP5	Solyc02g086100.3.1
	SlELP6	Solyc12g009500.2.1
Brachypodium distachyon	BdELP1	KQK15748
	BdELP2	KQJ98792
	BdELP3	KQJ83226
	BdELP4	KQK22657
	BdELP5	KQK16749
	BdELP6	PNT77961
	BdELP7	KQK22215
Hordeum vulgare	HvELP1	HORVU.MOREX.r3.2HG0134810.1
	HvELP2	HORVU.MOREX.r3.1HG0021770.1
	HvELP3	HORVU.MOREX.r3.2HG0176660.1
	HvELP4	HORVU.MOREX.r3.7HG0745890.1
	HvELP5	HORVU.MOREX.r3.4HG0398870.1
	HvELP6	HORVU.MOREX.r3.4HG0385950.1
Arabidopsis thaliana	AtELP1	AT5G13680.1
	AtELP2	AT1G49540.2
	AtELP3	AT5G50320.1
	AtELP4	AT3G11220.2
	AtELP5	AT2G18410.1
	AtELP6	AT4G10090.1
Oryza sativa	OsELP1	LOC_Os07g37640.1
	OsELP2	LOC_Os08g38570.1
	OsELP3	LOC_Os04g40840.1
	OsELP4	LOC_Os06g43280.1
	OsELP5	LOC_Os03g10460.1
	OsELP6	LOC_Os03g17560.1

## Sheet: Table S4
Table S4. Sequence identity and query cover of TaELPs proteins
Gene-1	Gene-2	Query Cover	Percent identity
TaTPP1-A	TaTPP1-A	1	1
TaTPP1-A	TaTPP1-D	1	0.978
TaTPP1-A	TaTPP1-B	1	0.978
TaTPP1-B	TaTPP1-B	1	1
TaTPP1-B	TaTPP1-A	1	0.984
TaTPP1-B	TaTPP1-D	1	0.989
TaTPP1-D	TaTPP1-D	1	1
TaTPP1-D	TaTPP1-A	1	0.983
TaTPP1-D	TaTPP1-B	1	0.989
TaTPP2-A	TaTPP2-A	1	1
TaTPP2-A	TaTPP2-B	1	0.977
TaTPP2-A	TaTPP2-D	1	0.98
TaTPP2-B	TaTPP2-B	1	1
TaTPP2-B	TaTPP2-D	1	0.98
TaTPP2-B	TaTPP2-A	1	0.979
TaTPP2-D	TaTPP2-D	1	1
TaTPP2-D	TaTPP2-B	1	0.977
TaTPP2-D	TaTPP2-A	1	0.98
TaTPP3-A	TaTPP3-A	1	1
TaTPP3-A	TaTPP3-D	1	0.998
TaTPP3-A	TaTPP3-B	1	0.998
TaTPP3-B	TaTPP3-B	1	1
TaTPP3-B	TaTPP3-A	1	0.998
TaTPP3-B	TaTPP3-D	1	1
TaTPP3-D	TaTPP3-D	1	1
TaTPP3-D	TaTPP3-A	1	0.998
TaTPP3-D	TaTPP3-B	1	1
TaTPP4-A	TaTPP4-A	1	1
TaTPP4-A	TaTPP4-B	1	0.98
TaTPP4-A	TaTPP4-D	1	0.974
TaTPP4-B	TaTPP4-B	1	1
TaTPP4-B	TaTPP4-A	1	0.974
TaTPP4-B	TaTPP4-D	1	0.967
TaTPP4-D	TaTPP4-D	1	1
TaTPP4-D	TaTPP4-B	1	0.967
TaTPP4-D	TaTPP4-A	1	0.98
TaTPP5-A	TaTPP5-A	1	1
TaTPP5-A	TaTPP5-B	1	0.964
TaTPP5-A	TaTPP5-D	1	0.964
TaTPP5-B	TaTPP5-B	1	1
TaTPP5-B	TaTPP5-A	1	0.964
TaTPP5-B	TaTPP5-D	1	0.959
TaTPP5-D	TaTPP5-D	1	1
TaTPP5-D	TaTPP5-A	1	0.964
TaTPP5-D	TaTPP5-B	1	0.959
TaTPP6-A	TaTPP6-A	1	1
TaTPP6-A	TaTPP6-B	1	0.958
TaTPP6-A	TaTPP6-D	1	0.972
TaTPP6-B	TaTPP6-B	1	1
TaTPP6-B	TaTPP6-A	1	0.968
TaTPP6-B	TaTPP6-D	1	0.959
TaTPP6-D	TaTPP6-D	1	1
TaTPP6-D	TaTPP6-A	1	0.972
TaTPP6-D	TaTPP6-B	1	0.968

## Sheet: Table S5 
Table S5. Validation of TaELPs protein structures
Protein ID	Protein Name	Residues in favoured region	Residues in outlier region	Aliphatic Index	Instability Index	Sequence Identity	Sequence similarity	Coverage
TraesCS1A02G104700.1	TaELP1-A	0.8728	0.0259	84.67	44.07	0.2962	0.35	0.88
TraesCS1B02G116100.1	TaELP1-B	0.8639	0.0285	86.05	42.1	0.3134	0.36	0.88
TraesCS1D02G096900.1	TaELP1-D	0.8644	0.0315	83.98	43.44	0.3027	0.35	0.88
TraesCS2A02G203700.1	TaELP2-A	0.8706	0.0322	90.59	44.21	0.2169	0.32	0.89
TraesCS2B02G231000.1	TaELP2-B	0.8847	0.0322	90.95	44.05	0.2188	0.32	0.89
TraesCS2D02G212000.1	TaELP2-D	0.8792	0.0243	90.6	42.54	0.2203	0.32	0.89
TraesCS2A02G320900.1	TaELP3-A	0.9413	0.0022	85.55	35.59	0.6877	0.52	0.95
TraesCS2B02G361800.1	TaELP3-B	0.9432	0.0044	85.89	35.55	0.7176	0.53	0.9
TraesCS2D02G341600.1	TaELP3-D	0.9423	0.0044	85.55	35.55	0.7176	0.53	0.9
TraesCS4A02G045700.1	TaELP4-A	0.8327	0.0389	84.32	51.44	0.1518	0.29	0.58
TraesCS4B02G259300.1	TaELP4-B	0.8599	0.0545	83.05	53.49	0.1518	0.29	0.58
TraesCS4D02G259200.1	TaELP4-D	0.8327	0.0627	85.34	52.06	0.1518	0.29	0.58
TraesCS4A02G105200.1	TaELP5-A	0.9348	0.013	101.83	31.37	0.1461	0.28	0.87
TraesCS4B02G198800.1	TaELP5-B	0.9306	0.0145	99.52	33.83	0.1256	0.27	0.83
TraesCS4D02G199700.1	TaELP5-D	0.9159	0.0221	97.56	35.06	0.1215	0.26	0.84
TraesCS7A02G522900.2	TaELP6-A	0.9054	0.0315	80.84	53.26	0.1841	0.31	0.82
TraesCS7B02G439900.1	TaELP6-B	0.9034	0.028	78.88	50.04	0.185	0.31	0.83
TraesCS7D02G512100.1	TaELP6-D	0.8966	0.0313	79.35	47.94	0.183	0.31	0.83

## Sheet: Table S6
Table S6. Details of the calculated secondary structure elements TaELPs by SOPMA
	Protein Name	Alpha helix (Hh)	Extended strand (Ee)	Beta turn (Tt)	Random coil (Cc)	310 helix	Pi helix	Beta bridge	Bend region	Ambiguous states	Other states
TaELP1-A	TraesCS1A02G104700.1	0.1352	0.323	0.0443	0.4976	0	0	0	0	0	0
TaELP1-B	TraesCS1B02G116100.1	0.1557	0.3018	0.0431	0.4994	0	0	0	0	0	0
TaELP1-D	TraesCS1D02G096900.1	0.1706	0.2986	0.0415	0.4893	0	0	0	0	0	0
TaELP2-A	TraesCS2A02G203700.1	0.4128	0.1781	0.0445	0.3645	0	0	0	0	0	0
TaELP2-B	TraesCS2B02G231000.1	0.4199	0.1782	0.0491	0.3527	0	0	0	0	0	0
TaELP2-D	TraesCS2D02G212000.1	0.4091	0.1864	0.0498	0.3547	0	0	0	0	0	0
TaELP3-A	TraesCS2A02G320900.1	0.4446	0.1353	0.0615	0.3585	0	0	0	0	0	0
TaELP3-B	TraesCS2B02G361800.1	0.4394	0.1318	0.0738	0.355	0	0	0	0	0	0
TaELP3-D	TraesCS2D02G341600.1	0.4359	0.1371	0.0703	0.3568	0	0	0	0	0	0
TaELP4-A	TraesCS4A02G045700.1	0.4271	0.151	0.0469	0.375	0	0	0	0	0	0
TaELP4-B	TraesCS4B02G259300.1	0.3776	0.1458	0.0547	0.4219	0	0	0	0	0	0
TaELP4-D	TraesCS4D02G259200.1	0.401	0.1484	0.0521	0.3984	0	0	0	0	0	0
TaELP5-A	TraesCS4A02G105200.1	0.3532	0.2143	0.0992	0.3333	0	0	0	0	0	0
TaELP5-B	TraesCS4B02G198800.1	0.384	0.208	0.096	0.312	0	0	0	0	0	0
TaELP5-D	TraesCS4D02G199700.1	0.4016	0.1929	0.1024	0.3031	0	0	0	0	0	0
TaELP6-A	TraesCS7A02G522900.2	0.3655	0.0966	0.047	0.4909	0	0	0	0	0	0
TaELP6-B	TraesCS7B02G439900.1	0.3584	0.1091	0.039	0.4935	0	0	0	0	0	0
TaELP6-D	TraesCS7D02G512100.1	0.3438	0.125	0.0339	0.4974	0	0	0	0	0	0

## Sheet: Table S7
Table S7. Cis-acting element regulation (CAREs) with sequences and functions
I	Cis-elements	Sequence	Functions
Stress	MYC	CATGTG/CATTTG/CAATTG	stress response element
	3-AF1 binding site	TAAGAGAGGAA	light responsive element
	ABRE3a	TACGTG	cis-acting regulatory element involved in light responsiveness
	ABRE4	CACGTA	cis-acting regulatory element involved in light responsiveness
	ACE	GCGACGTACC	cis-acting element involved in light responsiveness
	AE-box	AGAAACAA	part of a module for light response
	ARE	AAACCA	cis-acting regulatory element essential for the anaerobic induction
	as-1	TGACG	stress response element
	Box 4	ATTAAT	part of a conserved DNA module involved in light responsiveness
	Box II	CCACGTGGC	part of a light responsive element
	box S	AGCCACC	elicitation; wounding and pathogen responsievness
	CCAAT-box	CAACGG	MYBHv1 binding site (involved in the activation of stress and defense genes in plants)
	chs-CMA1a	TTACTTAA	part of a light responsive element
	chs-CMA2a	TCACTTGA	part of a light responsive element
	chs-Unit 1 m1	ACCTAACCCGG	part of a light responsive element
	DRE core	GCCGAC	cis-acting element that regulates cold- and dehydration-responsive gene expression
	GA-motif	ATAGATAA	part of a light responsive element
	Gap-box	CAAATGAA(A/G)A	part of a light responsive element
	GATA-motif	GATAGGA	part of a light responsive element
	G-box	CACGTC/GCCACGTGGA	cis-acting regulatory element involved in light responsiveness
	GC-motif	CCCCCG	enhancer-like element involved in anoxic specific inducibility
	GT1-motif	GCGGTAATT/GGTTAA/GGTTAAT	light responsive element
	GTGGC-motif	CAGCGTGTGGC	part of a light responsive element
	I-box	gGATAAGGTG	part of a light responsive element
	LAMP-element	CTTTATCA	part of a light responsive element
	LTR	CCGAAA	cis-acting element involved in low-temperature responsiveness
	MBS	CAACTG	MYB binding site involved in drought-inducibility
	MRE	AACCTAA	MYB binding site involved in light responsiveness
	MYB	CAACCA/TAACCA	stress response element
	Myb	CAACTG	stress response element
	MYB recognition site	CCGTTG	stress response element
	Myb-binding site	CAACAG	stress response element
	MYB-like sequence	TAACCA	stress response element
	Myc	TCTCTTA	stress response element
	P-box	CAACAAACCCCTT	gibberellin-responsive element and part of a light responsive element
	plant_AP-2-like	CGACCAGG	anoxic specific inducibility element GC-motif
	Sp1	GGGCGG	light responsive element
	STRE	AGGGG	stress response element
	TCCC-motif	TCTCCCT	part of a light responsive element
	TC-rich repeats	ATTCTCTAAC	cis-acting element involved in defense and stress responsiveness
	TCT-motif	TCTTAC	part of a light responsive element
	Unnamed__1	CGTGG	stress response element
	Unnamed__8	TCCACGTAGA	stress response element
	Unnamed_1	GCCACGTGGC/CGTGG	stress response element
	W box	TTGACC	fungal elicitor responsive element
	WRE3	CCACCT	stress response element
	WUN-motif	CAATTACAT/AAATTTCTT/AAATTACT	stress response element
II	Cis-elements	Sequence	Functions
Hormonal	MBSI	aaaAaaC(G/C)GTTA	MYB binding site involved in flavonoid biosynthetic genes regulation
	ABRE	ACGTG/TACGGTC/AACCCGG/CACGTG	cis-acting element involved in the abscisic acid responsiveness
	ABRE2	CCACGTGG	cis-acting element involved in the abscisic acid responsiveness
	AuxRR-core	GGTCCAT	cis-acting regulatory element involved in auxin responsiveness
	CGTCA-motif	CGTCA	cis-acting regulatory element involved in the MeJA-responsiveness
	ERE	ATTTTAAA	Ethylene-responsive element
	GARE-motif	TCTGTTG	gibberellin-responsive element
	O2-site	GATGACATGG	cis-acting regulatory element involved in zein metabolism regulation
	TATC-box	TATCCCA	cis-acting element involved in gibberellin-responsiveness
	TCA	TCATCTTCAT	salicylic acid responsive element
	TCA-element	CCATCTTTTT	cis-acting element involved in salicylic acid responsiveness
	TGACG-motif	TGACG	cis-acting regulatory element involved in the MeJA-responsiveness
	TGA-element	AACGAC	auxin-responsive element
III	Cis-elements	Sequence	Functions
Core	CAAT-box	CAAT/CAAAT/TGCCAAC/CCAAT/CAACCAACTCC	common cis-acting element in promoter and enhancer regions
	TATA-box	TACAAAA/TATA/ccTATAAAaaTATAA/ATATAA/TATATTTATATTT/TATACA/TACATAAA	core promoter element around -30 of transcription start
	AT~TATA-box	TATATA/TATATAA/taTATAAAtc	core promoter element around -30 of transcription start
	TATA	TATAAAAT	core promoter element around -30 of transcription start
IV	Cis-elements	Sequence	Functions
Cellular	AAGAA-motif	GAAAGAA/gGTAAAGAAA	cis-element involved in seed specific expression
	AC-I	GCTTACCTACCA/(T/C)C(T/C)(C/T)ACC(T/C)ACC	Cellular Development
	CAT-box	GCCACT	cis-acting regulatory element related to meristem expression
	E2Fb	TTTGCCGC	acts as a repressor outside S phase and as an activator during S phase
	GCN4_motif	TGAGTCA	cis-regulatory element involved in endosperm expression
	MSA-like	TCCAACGGT	cis-acting element involved in cell cycle regulation
	RY-element	CATGCATG	cis-acting regulatory element involved in seed-specific regulation
	circadian	CAAAGATATC	cis-acting regulatory element involved in circadian control
	Unnamed__4	CTCC	temporal and spatial specificity of DYT1(Anther) expression
V	Cis-elements	Sequence	Functions
Unknown	Unnamed__2	CCCCGG	antisense transcript
	A-box	CCGTCC	cis-acting regulatory element
	ACTCATCCT sequence	ACTCATCCT	Unknown
	AP-1	TGAGTTAG	Unknown
	CARE	CAACTCCC	Unknown
	CCGTCC motif	CCGTCC	Unknown
	CCGTCC-box	CCGTCC	Unknown
	CTAG-motif	ACTAGCAGAA	cis-acting regulatory element
	dOCT	CACGGATC	Unknown
	DRE1	ACCGAGA	Unknown
	F-box	CTATTCTCATT	Unknown
	NON	CAACGGCCACG	Unknown
	re2f-1	GCGGGAAA	Unknown
	Unnamed__10	TCCACGTAGA	Unknown
	Unnamed__12	TCCACGTAGA	Unknown
	Unnamed__14	TCCACGTAGA	Unknown
	Unnamed__16	GCTGCCCGTC	Involved in Sugar Transporter Family Genes
	Unnamed__6	taTAAATATct	Unknown

## Sheet: Table S8
Table S8. Frequency of all identifiedCis-acting element regulation (CAREs) in different TaELPs promoters
Gene name	MYC	Box 4	MBSI	CAAT-box	WRE3	Unnamed__1	MYB-like sequence	AAGAA-motif	STRE	G-box	TATC-box	TATA-box	AE-box	TGA-element	Unnamed__4	Unnamed__2	MRE	circadian	GTGGC-motif	ABRE	MYB	ACE	Sp1	TGACG-motif	CCGTCC motif	chs-CMA2a	as-1	O2-site	CCGTCC-box	CGTCA-motif	LTR	DRE core	re2f-1	Myb-binding site	GC-motif	GT1-motif	A-box	MYB recognition site	AuxRR-core	TCA-element	CCAAT-box	W box	TCA	DRE1	TC-rich repeats	LAMP-element	AT~TATA-box	ABRE3a	ABRE4
TaELP1-A	2	2	1	21	1	1	1	1	3	1	1	4	1	1	18	1	1	2	1	1	2	0	0	0	0	0	0	0	0	0	0	0	0	0	0	0	0	0	0	0	0	0	0	0	0	0	0	0	0
TaELP1-B	0	2	0	8	1	7	1	0	7	5	0	6	1	1	41	8	0	0	0	1	8	1	6	5	1	1	5	2	1	5	1	1	1	2	6	1	1	0	0	0	0	0	0	0	0	0	0	0	0
TaELP1-D	1	0	0	20	0	2	1	0	14	5	0	15	1	0	35	0	0	0	0	7	2	0	1	5	0	0	5	0	0	5	3	1	0	0	1	0	0	1	1	1	1	2	1	1	1	1	3	1	1
TaELP2-A	3	0	0	21	1	3	2	1	3	1	0	9	0	1	17	0	0	0	0	0	2	0	3	2	3	0	2	0	3	2	1	6	0	0	0	2	3	1	1	0	1	1	0	2	0	0	0	0	0
TaELP2-B	1	2	0	14	1	2	0	0	5	0	9	0	0	0	14	0	0	0	0	0	4	0	1	0	1	0	0	0	1	0	1	1	0	2	1	0	1	1	0	0	1	0	0	0	0	0	0	0	0
TaELP2-D	2	1	0	21	3	3	1	0	4	0	10	0	0	0	14	1	0	0	0	0	4	0	1	2	3	0	2	0	3	2	0	1	0	2	1	0	3	1	0	2	1	1	0	0	0	0	0	0	0
TaELP3-A	1	1	0	23	1	2	0	0	0	2	0	10	1	0	22	0	1	0	0	2	2	0	1	2	2	0	2	0	2	2	1	2	0	1	0	0	2	1	0	1	1	1	0	0	0	0	0	0	0
TaELP3-B	2	2	0	22	0	4	1	1	2	4	0	15	1	1	21	0	1	0	0	3	3	0	2	1	2	0	1	0	2	1	0	2	0	1	0	1	2	1	1	0	1	0	0	0	0	0	0	0	0
TaELP3-D	3	1	0	23	0	6	0	1	1	4	0	9	1	0	17	1	1	0	0	3	2	0	2	0	2	0	0	0	2	0	1	2	1	1	0	0	2	2	1	0	2	0	0	0	0	0	0	0	0
TaELP4-A	5	1	0	27	1	0	1	0	8	1	0	25	0	1	24	0	0	0	0	0	6	0	1	1	0	0	1	0	0	1	1	0	0	3	4	2	0	0	0	0	0	0	0	0	0	0	3	0	0
TaELP4-B	3	1	0	27	1	1	1	2	4	2	0	14	1	1	25	0	0	1	0	1	8	0	1	1	0	0	1	0	0	1	1	0	0	3	4	4	0	0	0	0	0	0	0	0	0	0	2	1	1
TaELP4-D	5	1	0	27	2	1	1	0	4	3	0	15	1	0	23	0	0	1	0	1	6	0	1	2	0	0	2	0	0	2	2	0	0	3	4	2	0	1	0	0	1	0	0	0	1	0	2	1	1
TaELP5-A	2	2	0	16	0	9	1	2	3	4	0	16	0	1	23	1	0	0	0	3	4	0	2	3	4	0	3	0	4	3	1	1	0	1	3	0	4	0	0	0	0	1	0	0	0	0	0	1	1
TaELP5-B	1	3	0	19	1	6	1	1	2	3	1	16	0	1	25	0	0	0	0	3	3	0	3	5	1	1	5	1	1	5	0	1	0	0	2	0	1	0	0	0	0	0	1	1	0	0	0	1	1
TaELP5-D	3	3	0	20	0	8	1	1	2	3	0	13	0	1	22	0	0	0	0	4	4	0	2	2	3	1	2	0	3	2	0	1	0	0	2	0	3	0	0	0	0	0	0	1	0	0	0	1	1
TaELP6-A	4	0	0	24	5	3	0	0	3	4	5	0	0	1	18	0	0	0	0	3	0	0	0	3	1	0	3	1	1	3	3	0	0	0	0	3	1	1	0	0	1	5	1	0	0	0	0	0	0
TaELP6-B	4	3	0	35	1	1	0	1	4	12	0	37	2	0	10	0	0	0	0	9	1	0	2	1	1	0	1	0	1	1	1	1	0	0	1	0	1	0	0	0	0	1	1	0	1	0	1	2	2
TaELP6-D	3	1	0	6	1	4	0	6	1	5	0	2	0	0	9	2	0	0	0	5	0	0	1	1	0	0	1	0	0	1	4	0	0	0	1	0	0	1	0	1	1	1	0	0	0	0	0	1	1
[truncated: 42 more columns]

## Sheet: Table S9
Table S9: The protein-protein interaction network between TaELPs and other proteins in wheat
Node1	Node2	neighborhood_on_chromosome	gene_fusion	phylogenetic_cooccurrence	homology	coexpression	experimentally_determined_interaction	database_annotated	automated_textmining	combined_score
TaELP1-A	TaELP5-A	0	0	0	0	0.054	0.044	0.581	0.784	0.907
TaELP1-A	TaELP5-D	0	0	0	0	0.054	0.044	0.581	0.784	0.907
TaELP1-A	Traes_5AL_6E98DE4DC.2	0	0	0	0	0.052	0.886	0	0.754	0.971
TaELP1-A	Traes_5BL_D8ECD483D.2	0	0	0	0	0.052	0.886	0	0.754	0.971
TaELP1-A	Traes_5DL_A9A62BF38.1	0	0	0	0	0.052	0.886	0	0.754	0.971
TaELP1-A	Traes_5BL_92F800E16.1	0	0	0	0	0.052	0.886	0	0.754	0.971
TaELP1-A	Traes_7DL_EF5C1F9EA.1	0	0	0	0	0	0.848	0	0.836	0.974
TaELP1-A	Traes_7BL_69CD9E49D.2	0	0	0	0	0	0.848	0	0.836	0.974
TaELP1-A	TaELP6-D	0	0	0	0	0.053	0.911	0.581	0.84	0.993
TaELP1-A	TaELP6-B	0	0	0	0	0.053	0.911	0.581	0.84	0.993
TaELP1-A	TaELP6-A	0	0	0	0	0.053	0.911	0.581	0.84	0.993
TaELP1-A	TaELP2-D	0	0	0	0	0.69	0.911	0.648	0.825	0.998
TaELP1-A	TaELP2-B	0	0	0	0	0.69	0.911	0.648	0.825	0.998
TaELP1-A	TaELP2-A	0	0	0	0	0.69	0.911	0.648	0.825	0.998
TaELP1-A	TaELP3-B	0	0	0	0	0.851	0.911	0.648	0.846	0.999
TaELP1-A	TaELP3-D	0	0	0	0	0.851	0.911	0.648	0.846	0.999
TaELP1-A	TaELP3-A	0	0	0	0	0.851	0.911	0.648	0.846	0.999
TaELP1-B	Traes_1AL_D14E918FD.1	0	0	0	0	0.728	0.726	0	0.598	0.967
TaELP1-B	TaELP5-D	0	0	0	0	0.054	0.044	0.581	0.784	0.907
TaELP1-B	TaELP5-A	0	0	0	0	0.054	0.044	0.581	0.784	0.907
TaELP1-B	TaELP5-B	0	0	0	0	0.054	0.044	0.581	0.784	0.907
TaELP1-B	Traes_5BL_92F800E16.1	0	0	0	0	0.052	0.886	0	0.754	0.971
TaELP1-B	Traes_5DL_A9A62BF38.1	0	0	0	0	0.052	0.886	0	0.754	0.971
TaELP1-B	Traes_5BL_D8ECD483D.2	0	0	0	0	0.052	0.886	0	0.754	0.971
TaELP1-B	Traes_5AL_6E98DE4DC.2	0	0	0	0	0.052	0.886	0	0.754	0.971
TaELP1-B	Traes_7BL_69CD9E49D.2	0	0	0	0	0	0.848	0	0.836	0.974
TaELP1-B	Traes_7DL_EF5C1F9EA.1	0	0	0	0	0	0.848	0	0.836	0.974
TaELP1-B	TaELP6-A	0	0	0	0	0.053	0.911	0.581	0.84	0.993
TaELP1-B	TaELP6-B	0	0	0	0	0.053	0.911	0.581	0.84	0.993
TaELP1-B	TaELP6-D	0	0	0	0	0.053	0.911	0.581	0.84	0.993
TaELP1-B	TaELP2-A	0	0	0	0	0.69	0.911	0.648	0.825	0.998
TaELP1-B	TaELP2-B	0	0	0	0	0.69	0.911	0.648	0.825	0.998
TaELP1-B	TaELP2-D	0	0	0	0	0.69	0.911	0.648	0.825	0.998
TaELP1-B	TaELP3-A	0	0	0	0	0.851	0.911	0.648	0.846	0.999
TaELP1-B	TaELP3-D	0	0	0	0	0.851	0.911	0.648	0.846	0.999
TaELP1-B	TaELP3-B	0	0	0	0	0.851	0.911	0.648	0.846	0.999
TaELP1-D	Traes_1AL_D14E918FD.1	0	0	0	0	0.728	0.726	0	0.598	0.967
TaELP1-D	TaELP5-D	0	0	0	0	0.054	0.044	0.581	0.784	0.907
TaELP1-D	TaELP5-A	0	0	0	0	0.054	0.044	0.581	0.784	0.907
TaELP1-D	TaELP5-B	0	0	0	0	0.054	0.044	0.581	0.784	0.907
TaELP1-D	Traes_5BL_92F800E16.1	0	0	0	0	0.052	0.886	0	0.754	0.971
TaELP1-D	Traes_5DL_A9A62BF38.1	0	0	0	0	0.052	0.886	0	0.754	0.971
TaELP1-D	Traes_5AL_6E98DE4DC.2	0	0	0	0	0.052	0.886	0	0.754	0.971
TaELP1-D	Traes_5BL_D8ECD483D.2	0	0	0	0	0.052	0.886	0	0.754	0.971
TaELP1-D	Traes_7DL_EF5C1F9EA.1	0	0	0	0	0	0.848	0	0.836	0.974
TaELP1-D	Traes_7BL_69CD9E49D.2	0	0	0	0	0	0.848	0	0.836	0.974
TaELP1-D	TaELP6-D	0	0	0	0	0.053	0.911	0.581	0.84	0.993
TaELP1-D	TaELP6-A	0	0	0	0	0.053	0.911	0.581	0.84	0.993
TaELP1-D	TaELP6-B	0	0	0	0	0.053	0.911	0.581	0.84	0.993
TaELP1-D	TaELP2-D	0	0	0	0	0.69	0.911	0.648	0.825	0.998
TaELP1-D	TaELP2-A	0	0	0	0	0.69	0.911	0.648	0.825	0.998
TaELP1-D	TaELP2-B	0	0	0	0	0.69	0.911	0.648	0.825	0.998
TaELP1-D	TaELP3-A	0	0	0	0	0.851	0.911	0.648	0.846	0.999
TaELP1-D	TaELP3-B	0	0	0	0	0.851	0.911	0.648	0.846	0.999
TaELP1-D	TaELP3-D	0	0	0	0	0.851	0.911	0.648	0.846	0.999
TaELP2-A	TaELP1-A	0	0	0	0	0.69	0.911	0.648	0.825	0.998
TaELP2-A	TaELP1-B	0	0	0	0	0.69	0.911	0.648	0.825	0.998
TaELP2-A	TaELP1-D	0	0	0	0	0.69	0.911	0.648	0.825	0.998
TaELP2-A	TaELP3-A	0	0	0	0	0.256	0.911	0.648	0.864	0.996
TaELP2-A	TaELP5-D	0	0	0	0	0.049	0.08	0.581	0.813	0.922
TaELP2-A	TaELP5-A	0	0	0	0	0.049	0.08	0.581	0.813	0.922
TaELP2-A	TaELP5-B	0	0	0	0	0.049	0.08	0.581	0.813	0.922
TaELP2-A	TaELP4-B	0	0	0	0	0.688	0	0	0.818	0.94
TaELP2-A	TaELP4-D	0	0	0	0	0.688	0	0	0.818	0.94
TaELP2-A	TaELP4-A	0	0	0	0	0.688	0	0	0.818	0.94
TaELP2-A	Traes_5BL_92F800E16.1	0	0	0	0	0.093	0.835	0	0.828	0.972
TaELP2-A	Traes_5DL_A9A62BF38.1	0	0	0	0	0.093	0.835	0	0.828	0.972
TaELP2-A	Traes_5BL_D8ECD483D.2	0	0	0	0	0.093	0.835	0	0.828	0.972
TaELP2-A	Traes_5AL_6E98DE4DC.2	0	0	0	0	0.093	0.835	0	0.828	0.972
TaELP2-A	Traes_7DL_EF5C1F9EA.1	0	0	0	0	0	0.881	0	0.825	0.978
TaELP2-A	Traes_7BL_69CD9E49D.2	0	0	0	0	0	0.881	0	0.825	0.978
TaELP2-A	TaELP3-B	0	0	0	0	0.256	0.911	0.648	0.864	0.996
TaELP2-A	TaELP3-D	0	0	0	0	0.256	0.911	0.648	0.864	0.996
TaELP2-A	TaELP6-D	0	0	0	0	0.603	0.91	0.581	0.866	0.997
TaELP2-A	TaELP6-A	0	0	0	0	0.603	0.91	0.581	0.866	0.997
TaELP2-A	TaELP6-B	0	0	0	0	0.603	0.91	0.581	0.866	0.997
TaELP2-B	TaELP1-A	0	0	0	0	0.69	0.911	0.648	0.825	0.998
TaELP2-B	TaELP1-B	0	0	0	0	0.69	0.911	0.648	0.825	0.998
TaELP2-B	TaELP1-D	0	0	0	0	0.69	0.911	0.648	0.825	0.998
TaELP2-B	TaELP3-A	0	0	0	0	0.256	0.911	0.648	0.864	0.996
TaELP2-B	TaELP3-B	0	0	0	0	0.256	0.911	0.648	0.864	0.996
TaELP2-B	TaELP5-D	0	0	0	0	0.049	0.08	0.581	0.813	0.922
TaELP2-B	TaELP5-A	0	0	0	0	0.049	0.08	0.581	0.813	0.922
TaELP2-B	TaELP5-B	0	0	0	0	0.049	0.08	0.581	0.813	0.922
TaELP2-B	TaELP4-B	0	0	0	0	0.688	0	0	0.818	0.94
TaELP2-B	TaELP4-D	0	0	0	0	0.688	0	0	0.818	0.94
TaELP2-B	TaELP4-A	0	0	0	0	0.688	0	0	0.818	0.94
TaELP2-B	Traes_5BL_92F800E16.1	0	0	0	0	0.093	0.835	0	0.828	0.972
TaELP2-B	Traes_5DL_A9A62BF38.1	0	0	0	0	0.093	0.835	0	0.828	0.972
TaELP2-B	Traes_5BL_D8ECD483D.2	0	0	0	0	0.093	0.835	0	0.828	0.972
TaELP2-B	Traes_5AL_6E98DE4DC.2	0	0	0	0	0.093	0.835	0	0.828	0.972
TaELP2-B	Traes_7DL_EF5C1F9EA.1	0	0	0	0	0	0.881	0	0.825	0.978
TaELP2-B	Traes_7BL_69CD9E49D.2	0	0	0	0	0	0.881	0	0.825	0.978
TaELP2-B	TaELP3-D	0	0	0	0	0.256	0.911	0.648	0.864	0.996
TaELP2-B	TaELP6-D	0	0	0	0	0.603	0.91	0.581	0.866	0.997
TaELP2-B	TaELP6-A	0	0	0	0	0.603	0.91	0.581	0.866	0.997
TaELP2-B	TaELP6-B	0	0	0	0	0.603	0.91	0.581	0.866	0.997
TaELP2-D	TaELP1-A	0	0	0	0	0.69	0.911	0.648	0.825	0.998
TaELP2-D	TaELP1-B	0	0	0	0	0.69	0.911	0.648	0.825	0.998
TaELP2-D	TaELP1-D	0	0	0	0	0.69	0.911	0.648	0.825	0.998
TaELP2-D	TaELP3-A	0	0	0	0	0.256	0.911	0.648	0.864	0.996
TaELP2-D	TaELP3-B	0	0	0	0	0.256	0.911	0.648	0.864	0.996
TaELP2-D	TaELP3-D	0	0	0	0	0.256	0.911	0.648	0.864	0.996
TaELP2-D	TaELP5-D	0	0	0	0	0.049	0.08	0.581	0.813	0.922
TaELP2-D	TaELP5-A	0	0	0	0	0.049	0.08	0.581	0.813	0.922
TaELP2-D	TaELP5-B	0	0	0	0	0.049	0.08	0.581	0.813	0.922
TaELP2-D	TaELP4-B	0	0	0	0	0.688	0	0	0.818	0.94
TaELP2-D	TaELP4-D	0	0	0	0	0.688	0	0	0.818	0.94
TaELP2-D	TaELP4-A	0	0	0	0	0.688	0	0	0.818	0.94
TaELP2-D	Traes_5BL_92F800E16.1	0	0	0	0	0.093	0.835	0	0.828	0.972
TaELP2-D	Traes_5BL_D8ECD483D.2	0	0	0	0	0.093	0.835	0	0.828	0.972
TaELP2-D	Traes_5AL_6E98DE4DC.2	0	0	0	0	0.093	0.835	0	0.828	0.972
TaELP2-D	Traes_5DL_A9A62BF38.1	0	0	0	0	0.093	0.835	0	0.828	0.972
TaELP2-D	Traes_7DL_EF5C1F9EA.1	0	0	0	0	0	0.881	0	0.825	0.978
TaELP2-D	Traes_7BL_69CD9E49D.2	0	0	0	0	0	0.881	0	0.825	0.978
TaELP2-D	TaELP6-D	0	0	0	0	0.603	0.91	0.581	0.866	0.997
TaELP2-D	TaELP6-A	0	0	0	0	0.603	0.91	0.581	0.866	0.997
TaELP2-D	TaELP6-B	0	0	0	0	0.603	0.91	0.581	0.866	0.997
TaELP3-A	TaELP1-A	0	0	0	0	0.851	0.911	0.648	0.846	0.999
TaELP3-A	TaELP1-B	0	0	0	0	0.851	0.911	0.648	0.846	0.999
TaELP3-A	TaELP1-D	0	0	0	0	0.851	0.911	0.648	0.846	0.999
TaELP3-A	TaELP5-B	0	0	0	0	0.059	0.053	0.581	0.823	0.925
TaELP3-A	TaELP5-A	0	0	0	0	0.059	0.053	0.581	0.823	0.925
TaELP3-A	TaELP5-D	0	0	0	0	0.059	0.053	0.581	0.823	0.925
TaELP3-A	Traes_2DS_E75C5D4AC.1	0	0	0	0	0.841	0.806	0	0	0.967
TaELP3-A	Traes_2BS_E0BE8F2D1.1	0	0	0	0	0.841	0.806	0	0	0.967
TaELP3-A	Traes_2AS_03ED0D137.1	0	0	0	0	0.841	0.806	0	0	0.967
TaELP3-A	Traes_5BL_D8ECD483D.2	0	0	0	0	0.052	0.89	0	0.829	0.98
TaELP3-A	Traes_5AL_6E98DE4DC.2	0	0	0	0	0.052	0.89	0	0.829	0.98
TaELP3-A	Traes_5DL_A9A62BF38.1	0	0	0	0	0.052	0.89	0	0.829	0.98
TaELP3-A	Traes_5BL_92F800E16.1	0	0	0	0	0.052	0.89	0	0.829	0.98
TaELP3-A	Traes_7BL_69CD9E49D.2	0	0	0	0	0.107	0.888	0	0.836	0.982
TaELP3-A	Traes_7DL_EF5C1F9EA.1	0	0	0	0	0.107	0.888	0	0.836	0.982
TaELP3-A	TaELP6-B	0	0	0	0	0.083	0.91	0.581	0.86	0.994
TaELP3-A	TaELP6-A	0	0	0	0	0.083	0.91	0.581	0.86	0.994
TaELP3-A	TaELP6-D	0	0	0	0	0.083	0.91	0.581	0.86	0.994
TaELP3-A	TaELP2-B	0	0	0	0	0.256	0.911	0.648	0.864	0.996
TaELP3-A	TaELP2-A	0	0	0	0	0.256	0.911	0.648	0.864	0.996
TaELP3-A	TaELP2-D	0	0	0	0	0.256	0.911	0.648	0.864	0.996
TaELP3-B	TaELP1-A	0	0	0	0	0.851	0.911	0.648	0.846	0.999
TaELP3-B	TaELP1-B	0	0	0	0	0.851	0.911	0.648	0.846	0.999
TaELP3-B	TaELP1-D	0	0	0	0	0.851	0.911	0.648	0.846	0.999
TaELP3-B	Traes_2AS_03ED0D137.1	0	0	0	0	0.841	0.806	0	0	0.967
TaELP3-B	TaELP2-A	0	0	0	0	0.256	0.911	0.648	0.864	0.996
TaELP3-B	TaELP5-D	0	0	0	0	0.059	0.053	0.581	0.823	0.925
TaELP3-B	TaELP5-B	0	0	0	0	0.059	0.053	0.581	0.823	0.925
TaELP3-B	TaELP5-A	0	0	0	0	0.059	0.053	0.581	0.823	0.925
TaELP3-B	Traes_2BS_E0BE8F2D1.1	0	0	0	0	0.841	0.806	0	0	0.967
TaELP3-B	Traes_2DS_E75C5D4AC.1	0	0	0	0	0.841	0.806	0	0	0.967
TaELP3-B	Traes_5BL_D8ECD483D.2	0	0	0	0	0.052	0.89	0	0.829	0.98
TaELP3-B	Traes_5AL_6E98DE4DC.2	0	0	0	0	0.052	0.89	0	0.829	0.98
TaELP3-B	Traes_5DL_A9A62BF38.1	0	0	0	0	0.052	0.89	0	0.829	0.98
TaELP3-B	Traes_5BL_92F800E16.1	0	0	0	0	0.052	0.89	0	0.829	0.98
TaELP3-B	Traes_7DL_EF5C1F9EA.1	0	0	0	0	0.107	0.888	0	0.836	0.982
TaELP3-B	Traes_7BL_69CD9E49D.2	0	0	0	0	0.107	0.888	0	0.836	0.982
TaELP3-B	TaELP6-D	0	0	0	0	0.083	0.91	0.581	0.86	0.994
TaELP3-B	TaELP6-A	0	0	0	0	0.083	0.91	0.581	0.86	0.994
TaELP3-B	TaELP6-B	0	0	0	0	0.083	0.91	0.581	0.86	0.994
TaELP3-B	TaELP2-D	0	0	0	0	0.256	0.911	0.648	0.864	0.996
TaELP3-B	TaELP2-B	0	0	0	0	0.256	0.911	0.648	0.864	0.996
TaELP3-D	TaELP1-A	0	0	0	0	0.851	0.911	0.648	0.846	0.999
TaELP3-D	TaELP1-B	0	0	0	0	0.851	0.911	0.648	0.846	0.999
TaELP3-D	TaELP1-D	0	0	0	0	0.851	0.911	0.648	0.846	0.999
TaELP3-D	Traes_2AS_03ED0D137.1	0	0	0	0	0.841	0.806	0	0	0.967
TaELP3-D	TaELP2-A	0	0	0	0	0.256	0.911	0.648	0.864	0.996
TaELP3-D	TaELP2-B	0	0	0	0	0.256	0.911	0.648	0.864	0.996
TaELP3-D	Traes_2BS_E0BE8F2D1.1	0	0	0	0	0.841	0.806	0	0	0.967
TaELP3-D	TaELP5-B	0	0	0	0	0.059	0.053	0.581	0.823	0.925
TaELP3-D	TaELP5-A	0	0	0	0	0.059	0.053	0.581	0.823	0.925
TaELP3-D	TaELP5-D	0	0	0	0	0.059	0.053	0.581	0.823	0.925
TaELP3-D	Traes_2DS_E75C5D4AC.1	0	0	0	0	0.841	0.806	0	0	0.967
TaELP3-D	Traes_5DL_A9A62BF38.1	0	0	0	0	0.052	0.89	0	0.829	0.98
TaELP3-D	Traes_5BL_D8ECD483D.2	0	0	0	0	0.052	0.89	0	0.829	0.98
TaELP3-D	Traes_5AL_6E98DE4DC.2	0	0	0	0	0.052	0.89	0	0.829	0.98
TaELP3-D	Traes_5BL_92F800E16.1	0	0	0	0	0.052	0.89	0	0.829	0.98
TaELP3-D	Traes_7DL_EF5C1F9EA.1	0	0	0	0	0.107	0.888	0	0.836	0.982
TaELP3-D	Traes_7BL_69CD9E49D.2	0	0	0	0	0.107	0.888	0	0.836	0.982
TaELP3-D	TaELP6-D	0	0	0	0	0.083	0.91	0.581	0.86	0.994
TaELP3-D	TaELP6-B	0	0	0	0	0.083	0.91	0.581	0.86	0.994
TaELP3-D	TaELP6-A	0	0	0	0	0.083	0.91	0.581	0.86	0.994
TaELP3-D	TaELP2-D	0	0	0	0	0.256	0.911	0.648	0.864	0.996
TaELP4-A	TaELP2-A	0	0	0	0	0.688	0	0	0.818	0.94
TaELP4-A	TaELP2-B	0	0	0	0	0.688	0	0	0.818	0.94
TaELP4-A	TaELP2-D	0	0	0	0	0.688	0	0	0.818	0.94
TaELP4-B	TaELP2-A	0	0	0	0	0.688	0	0	0.818	0.94
TaELP4-B	TaELP2-B	0	0	0	0	0.688	0	0	0.818	0.94
TaELP4-B	TaELP2-D	0	0	0	0	0.688	0	0	0.818	0.94
TaELP4-D	TaELP2-A	0	0	0	0	0.688	0	0	0.818	0.94
TaELP4-D	TaELP2-B	0	0	0	0	0.688	0	0	0.818	0.94
TaELP4-D	TaELP2-D	0	0	0	0	0.688	0	0	0.818	0.94
TaELP5-A	TaELP1-A	0	0	0	0	0.054	0.044	0.581	0.784	0.907
TaELP5-A	TaELP1-B	0	0	0	0	0.054	0.044	0.581	0.784	0.907
TaELP5-A	TaELP1-D	0	0	0	0	0.054	0.044	0.581	0.784	0.907
TaELP5-A	TaELP3-A	0	0	0	0	0.059	0.053	0.581	0.823	0.925
TaELP5-A	TaELP2-A	0	0	0	0	0.049	0.08	0.581	0.813	0.922
TaELP5-A	TaELP3-B	0	0	0	0	0.059	0.053	0.581	0.823	0.925
TaELP5-A	TaELP2-B	0	0	0	0	0.049	0.08	0.581	0.813	0.922
TaELP5-A	TaELP3-D	0	0	0	0	0.059	0.053	0.581	0.823	0.925
TaELP5-A	TaELP2-D	0	0	0	0	0.049	0.08	0.581	0.813	0.922
TaELP5-A	TaELP6-A	0	0	0	0	0.057	0.886	0.648	0.824	0.992
TaELP5-A	TaELP6-B	0	0	0	0	0.057	0.886	0.648	0.824	0.992
TaELP5-A	TaELP6-D	0	0	0	0	0.057	0.886	0.648	0.824	0.992
TaELP5-B	TaELP1-A	0	0	0	0	0.054	0.044	0.581	0.784	0.907
TaELP5-B	TaELP1-B	0	0	0	0	0.054	0.044	0.581	0.784	0.907
TaELP5-B	TaELP1-D	0	0	0	0	0.054	0.044	0.581	0.784	0.907
TaELP5-B	TaELP3-A	0	0	0	0	0.059	0.053	0.581	0.823	0.925
TaELP5-B	TaELP2-A	0	0	0	0	0.049	0.08	0.581	0.813	0.922
TaELP5-B	TaELP3-B	0	0	0	0	0.059	0.053	0.581	0.823	0.925
TaELP5-B	TaELP2-B	0	0	0	0	0.049	0.08	0.581	0.813	0.922
TaELP5-B	TaELP3-D	0	0	0	0	0.059	0.053	0.581	0.823	0.925
TaELP5-B	TaELP2-D	0	0	0	0	0.049	0.08	0.581	0.813	0.922
TaELP5-B	TaELP6-D	0	0	0	0	0.057	0.886	0.648	0.824	0.992
TaELP5-B	TaELP6-A	0	0	0	0	0.057	0.886	0.648	0.824	0.992
TaELP5-B	TaELP6-B	0	0	0	0	0.057	0.886	0.648	0.824	0.992
TaELP5-D	TaELP1-A	0	0	0	0	0.054	0.044	0.581	0.784	0.907
TaELP5-D	TaELP1-B	0	0	0	0	0.054	0.044	0.581	0.784	0.907
TaELP5-D	TaELP1-D	0	0	0	0	0.054	0.044	0.581	0.784	0.907
TaELP5-D	TaELP3-A	0	0	0	0	0.059	0.053	0.581	0.823	0.925
TaELP5-D	TaELP2-A	0	0	0	0	0.049	0.08	0.581	0.813	0.922
TaELP5-D	TaELP3-B	0	0	0	0	0.059	0.053	0.581	0.823	0.925
TaELP5-D	TaELP2-B	0	0	0	0	0.049	0.08	0.581	0.813	0.922
TaELP5-D	TaELP3-D	0	0	0	0	0.059	0.053	0.581	0.823	0.925
TaELP5-D	TaELP2-D	0	0	0	0	0.049	0.08	0.581	0.813	0.922
TaELP5-D	TaELP6-D	0	0	0	0	0.057	0.886	0.648	0.824	0.992
TaELP5-D	TaELP6-B	0	0	0	0	0.057	0.886	0.648	0.824	0.992
TaELP5-D	TaELP6-A	0	0	0	0	0.057	0.886	0.648	0.824	0.992
TaELP6-A	TaELP1-A	0	0	0	0	0.053	0.911	0.581	0.84	0.993
TaELP6-A	TaELP1-B	0	0	0	0	0.053	0.911	0.581	0.84	0.993
TaELP6-A	TaELP1-D	0	0	0	0	0.053	0.911	0.581	0.84	0.993
TaELP6-A	TaELP3-A	0	0	0	0	0.083	0.91	0.581	0.86	0.994
TaELP6-A	TaELP2-A	0	0	0	0	0.603	0.91	0.581	0.866	0.997
TaELP6-A	TaELP3-B	0	0	0	0	0.083	0.91	0.581	0.86	0.994
TaELP6-A	TaELP2-B	0	0	0	0	0.603	0.91	0.581	0.866	0.997
TaELP6-A	TaELP3-D	0	0	0	0	0.083	0.91	0.581	0.86	0.994
TaELP6-A	TaELP2-D	0	0	0	0	0.603	0.91	0.581	0.866	0.997
TaELP6-A	TaELP5-A	0	0	0	0	0.057	0.886	0.648	0.824	0.992
TaELP6-A	TaELP5-B	0	0	0	0	0.057	0.886	0.648	0.824	0.992
TaELP6-A	TaELP5-D	0	0	0	0	0.057	0.886	0.648	0.824	0.992
TaELP6-A	Traes_5AL_6E98DE4DC.2	0	0	0	0	0.041	0.509	0	0.828	0.911
TaELP6-A	Traes_5BL_92F800E16.1	0	0	0	0	0.041	0.509	0	0.828	0.911
TaELP6-A	Traes_5BL_D8ECD483D.2	0	0	0	0	0.041	0.509	0	0.828	0.911
TaELP6-A	Traes_5DL_A9A62BF38.1	0	0	0	0	0.041	0.509	0	0.828	0.911
TaELP6-B	TaELP1-A	0	0	0	0	0.053	0.911	0.581	0.84	0.993
TaELP6-B	TaELP1-B	0	0	0	0	0.053	0.911	0.581	0.84	0.993
TaELP6-B	TaELP1-D	0	0	0	0	0.053	0.911	0.581	0.84	0.993
TaELP6-B	TaELP3-A	0	0	0	0	0.083	0.91	0.581	0.86	0.994
TaELP6-B	TaELP2-A	0	0	0	0	0.603	0.91	0.581	0.866	0.997
TaELP6-B	TaELP3-B	0	0	0	0	0.083	0.91	0.581	0.86	0.994
TaELP6-B	TaELP2-B	0	0	0	0	0.603	0.91	0.581	0.866	0.997
TaELP6-B	TaELP3-D	0	0	0	0	0.083	0.91	0.581	0.86	0.994
TaELP6-B	TaELP2-D	0	0	0	0	0.603	0.91	0.581	0.866	0.997
TaELP6-B	TaELP5-A	0	0	0	0	0.057	0.886	0.648	0.824	0.992
TaELP6-B	TaELP5-B	0	0	0	0	0.057	0.886	0.648	0.824	0.992
TaELP6-B	TaELP5-D	0	0	0	0	0.057	0.886	0.648	0.824	0.992
TaELP6-B	Traes_5AL_6E98DE4DC.2	0	0	0	0	0.041	0.509	0	0.828	0.911
TaELP6-B	Traes_5BL_92F800E16.1	0	0	0	0	0.041	0.509	0	0.828	0.911
TaELP6-B	Traes_5BL_D8ECD483D.2	0	0	0	0	0.041	0.509	0	0.828	0.911
TaELP6-B	Traes_5DL_A9A62BF38.1	0	0	0	0	0.041	0.509	0	0.828	0.911
TaELP6-D	TaELP1-A	0	0	0	0	0.053	0.911	0.581	0.84	0.993
TaELP6-D	TaELP1-B	0	0	0	0	0.053	0.911	0.581	0.84	0.993
TaELP6-D	TaELP1-D	0	0	0	0	0.053	0.911	0.581	0.84	0.993
TaELP6-D	TaELP3-A	0	0	0	0	0.083	0.91	0.581	0.86	0.994
TaELP6-D	TaELP2-A	0	0	0	0	0.603	0.91	0.581	0.866	0.997
TaELP6-D	TaELP3-B	0	0	0	0	0.083	0.91	0.581	0.86	0.994
TaELP6-D	TaELP2-B	0	0	0	0	0.603	0.91	0.581	0.866	0.997
TaELP6-D	TaELP3-D	0	0	0	0	0.083	0.91	0.581	0.86	0.994
TaELP6-D	TaELP2-D	0	0	0	0	0.603	0.91	0.581	0.866	0.997
TaELP6-D	TaELP5-A	0	0	0	0	0.057	0.886	0.648	0.824	0.992
TaELP6-D	TaELP5-B	0	0	0	0	0.057	0.886	0.648	0.824	0.992
TaELP6-D	TaELP5-D	0	0	0	0	0.057	0.886	0.648	0.824	0.992
TaELP6-D	Traes_5AL_6E98DE4DC.2	0	0	0	0	0.041	0.509	0	0.828	0.911
TaELP6-D	Traes_5BL_92F800E16.1	0	0	0	0	0.041	0.509	0	0.828	0.911
TaELP6-D	Traes_5BL_D8ECD483D.2	0	0	0	0	0.041	0.509	0	0.828	0.911
TaELP6-D	Traes_5DL_A9A62BF38.1	0	0	0	0	0.041	0.509	0	0.828	0.911

## Sheet: Table S10
Table S10: List of primers used for TaELPs qRT-PCR and Virus-induced gene silencing (VIGS) analysis.
Gene name	Gene	F	R
TaELP1-A	TraesCS1A02G104700.1	GCAGCGCTTCTAATGATGGTC	TTCCATGCAAGCTGGTCCTC
TaELP1-B	TraesCS1B02G116100.1
TaELP1-D	TraesCS1D02G096900.1
TaELP2-A	TraesCS2A02G203700.1	TGGAGGAGGTTCTTCTTGAGC	TCGGTTGTTCTTTCCTCCACA
TaELP2-B	TraesCS2B02G231000.1
TaELP2-D	TraesCS2D02G212000.1
TaELP3-A	TraesCS2A02G320900.1	AAATCCAGCATTCCGAGCAG	CAGCTCTGGTGGGTAGTTTCTA
TaELP3-B	TraesCS2B02G361800.1
TaELP3-D	TraesCS2D02G341600.1
TaELP4-A	TraesCS4A02G045700.1	CCAAGTTTTCCCGAGCTTTTGA	TGCTCAAGGAAAGACATGTCC
TaELP4-B	TraesCS4B02G259300.1
TaELP4-D	TraesCS4D02G259200.1
TaELP5-A	TraesCS4A02G105200.1	GGAGAAAATGCAGGTCGGC	CACACAATAATGCAAGAAGTCCA
TaELP5-B	TraesCS4B02G198800.1
TaELP5-D	TraesCS4D02G199700.1
TaELP6-A	TraesCS7A02G522900.2	CGCTGCTGTCAATAAAAGCAATC	GTGCCACCTTATGAACATGTAGA
TaELP6-B	TraesCS7B02G439900.1
TaELP6-D	TraesCS7D02G512100.1
TaEF-1α	Q03033	TGGTGTCATCAAGCCTGGTATGGT	ACTCATGGTGCATCTCAACGGACT
BSMV:TaELP2-as1		TAGCTAGCTGATTAATTAATTTGCATGGACTACTGCTGTCAG	TTGCTAGCTGAGCGGCCGCGTGAGGTGCATAGAGTTATTCAAACTG
BSMV:TaELP2-as2		TAGCTAGCTGATTAATTAAAGTGCTCTCAGAAACATTGTGTCTG	TAGCTAGCTGATTAATTAAAGTGCTCTCAGAAACATTGTGTCTG
